# Supplementary material for: Increased Accumulation of Recombinant Proteins in Soybean Seeds via the Combination Strategy of Polypeptide Fusion and Suppression of Endogenous Storage Proteins
Source: MDPI journal article supplement (doi:10.3390/agronomy13112680), 2023-10-25

**Figure S3. LibertyLink<sup>®</sup> strip analysis of T<sub>0</sub> transgenic soybean plants.** Nt, non-transformed control. Small arrows indicate test line.

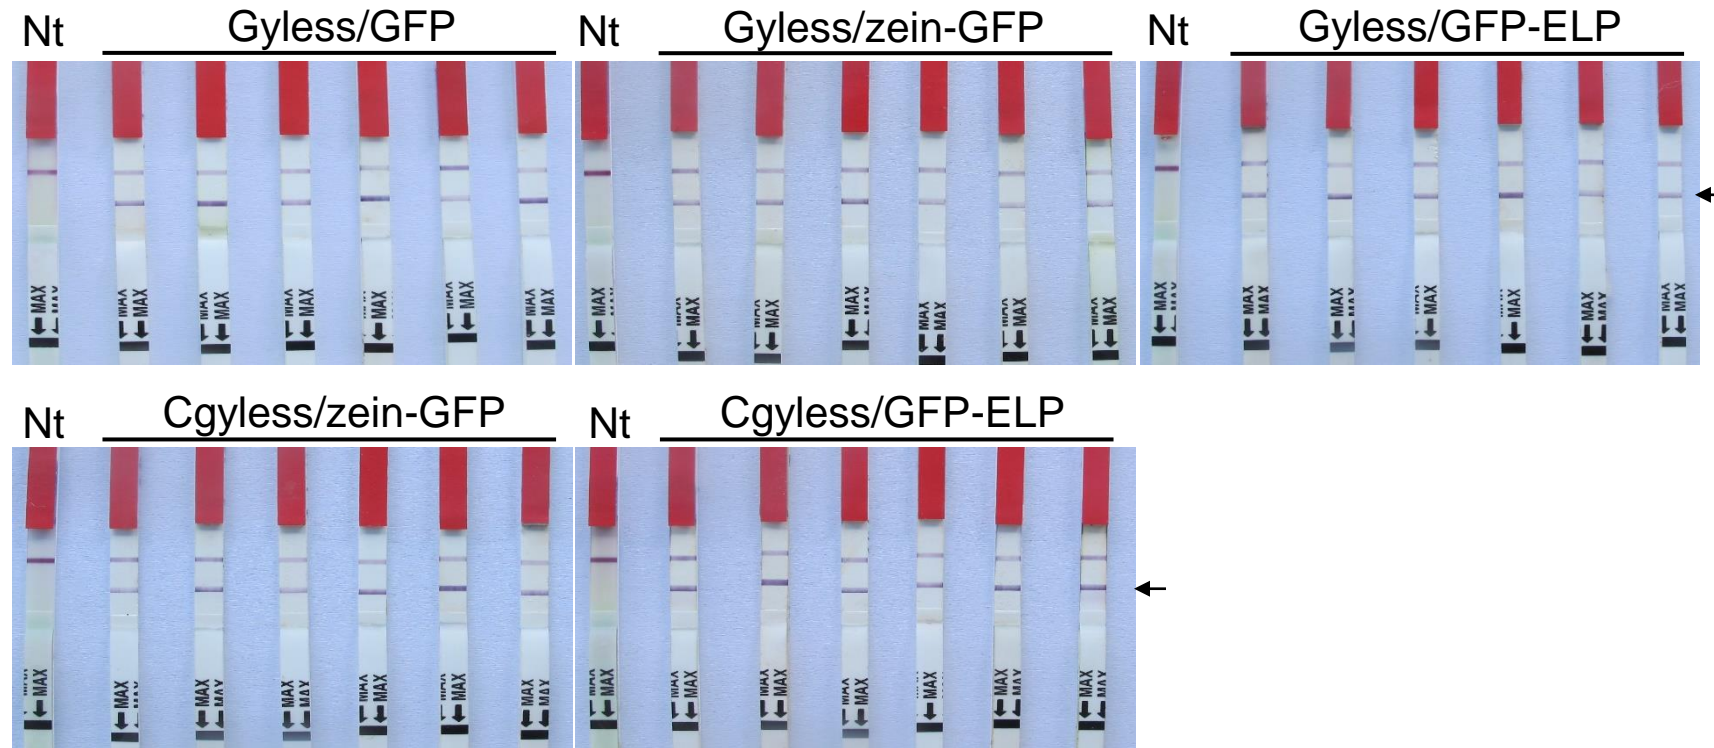

Supplement: s1 [file s1]
