# Supplementary material for: Increased Accumulation of Recombinant Proteins in Soybean Seeds via the Combination Strategy of Polypeptide Fusion and Suppression of Endogenous Storage Proteins
Source: MDPI journal article supplement (doi:10.3390/agronomy13112680), 2023-10-25
Supplement: s1 [file s1]

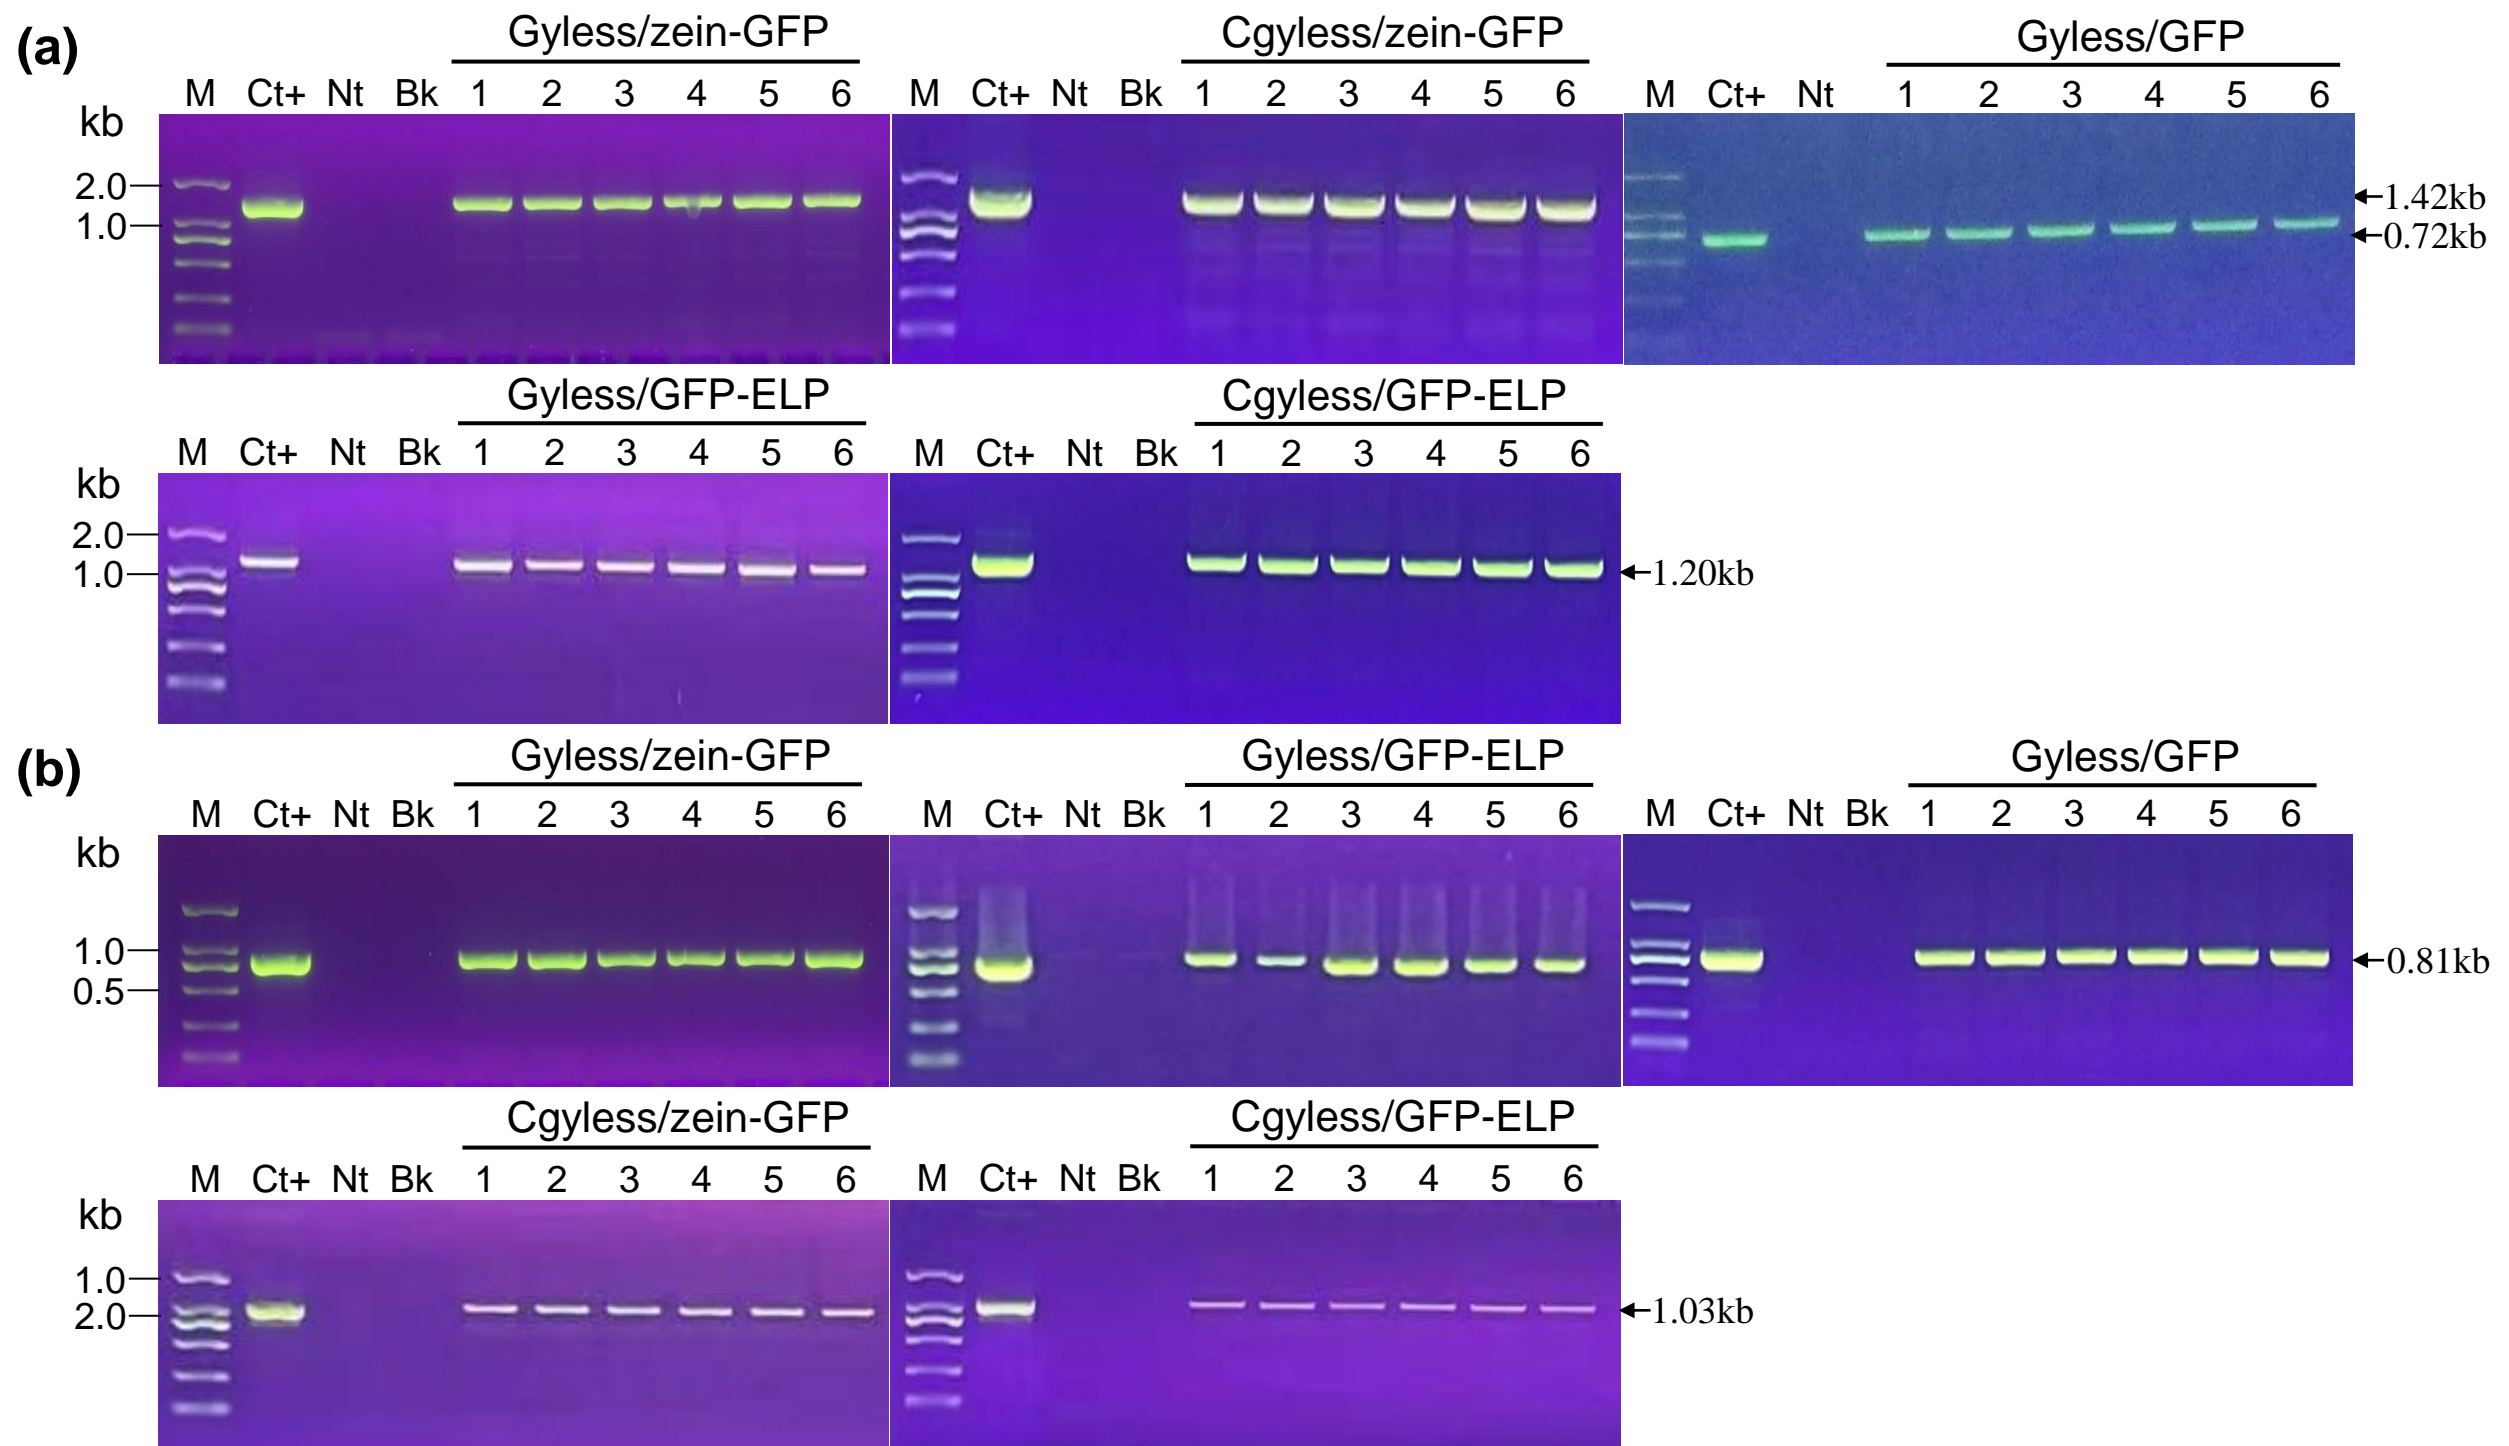

**Figure S4 Verification of T<sub>1</sub> transgenic soybean plants by PCR to confirm the presence of foreign genes**

**(a) and Gy or Cgy RNAi fragments (b).** M, DL2000 DNA marker; Ct+, positive controls with corresponding vectors; Nt, non-transformed plants; Bk, blank control (ddH<sub>2</sub>O); 1–6, T<sub>1</sub> transgenic soybean plants.
