# Supplementary material for: Increased Accumulation of Recombinant Proteins in Soybean Seeds via the Combination Strategy of Polypeptide Fusion and Suppression of Endogenous Storage Proteins
Source: MDPI journal article supplement (doi:10.3390/agronomy13112680), 2023-10-25
Supplement: s1 [file s1]

**Table S1** Primers used for PCR and RT-qPCR analysis in this study

| Genes           | GenBank No.  | Forward/reverse primers (5'–3')                              | Sizes (bp) |
|-----------------|--------------|--------------------------------------------------------------|------------|
| <i>zein-gfp</i> | /            | ATGAGGGTGTGCTCGTTGCCC<br>TTATTTGTATAGTTCATCCATGCCATG         | 1419       |
| <i>gfp-elp</i>  | /            | ATGAGTAAAGGAGAAGAAGCTTTTCACTG<br>TCAAAGTTCATCCTTCTCAGAACCAAC | 1206       |
| <i>gfp</i>      | X83959.1     | ATGAGTAAAGGAGAAGAAGCTTTTCA<br>TTTGTATAGTTCATCCATGCCATGT      | 714        |
| <i>Gy</i> RNAi  | /            | ACGCCTCAGGTTCTCCGCTT<br>AATTATTTCTTACCAATTGGGGTACC           | 811        |
| <i>Cgy</i> RNAi | /            | AGCACCTACTTCTGTGACGTG<br>TCTTCTTCGTCTTACACATCACTTGTC         | 1034       |
| <i>gfp</i>      | X83959.1     | TACGTGCAGGAGAGGACCAT<br>ACTTGTGGCCGAGGATGTTT                 | 148        |
| <i>Gy1</i>      | X15121       | GGTGAGAGAGTGTTTGATGGAGAG<br>GGGTTGTTGTTCTTTATCTGCCTG         | 245        |
| <i>Gy2</i>      | NM_001248881 | CACCTGACATCTACAACCCTCAAG<br>CCATCAAACACTCTCTCACCATTG         | 223        |
| <i>Gy3</i>      | X15123       | GTGAGAGAGTGTTTGATGGAGAGC<br>GAAAGGGTGTGTTCTTGACCTG           | 248        |
| <i>Gy4</i>      | AB195712     | GCCATCAGTCTTCTTGACACCT<br>ACCTTCTTCCTCTTCCTCCTGC             | 180        |
| <i>Gy5</i>      | FJ599666     | CATTAGCACCTCAACAGTCTCA<br>AGCCACCACAAAGTTCTGCG               | 244        |
| <i>Cgy1</i>     | GU723691     | TCGGGACTTGATGTCTTCCTC<br>CTTCCTGTTGCTGCCTCTGTT               | 164        |
| <i>Cgy2</i>     | AB237643     | ACTTCCTCGCAGGTTTCGAA<br>CCCTCCTCTTTCTTCTTAGGCTGA             | 157        |
| <i>Cgy3</i>     | NM_001249943 | TGTCAACGCTACCTCAAACCTC<br>AGGACCCTTTCTTCCCTTACTCC            | 244        |
| <i>Gmactin6</i> | NM_001289231 | ATCTTGACTGAGCGTGGTTATTCC<br>GCTGGTCCTGGCTGTCTCC              | 126        |
