# Supplementary material for: Increased Accumulation of Recombinant Proteins in Soybean Seeds via the Combination Strategy of Polypeptide Fusion and Suppression of Endogenous Storage Proteins
Source: MDPI journal article supplement (doi:10.3390/agronomy13112680), 2023-10-25
Supplement: s1 [file s1]

**Figure S2** Tandem RNAi fragment (721-bp) based on the conservative sequences of the soybean conglycinin subunit-encoding genes (*Cgy1*, *Cgy12*, and *Cgy13*).

```
1      ATGATGAGAG CGCGGTTCCC ATTACTGTTG CTGGGAGTTG TTTTCCTGGC ATCAGTTTCT
61     GTCTCATTTG GCATTGCGTA TTGGGAAAAG CAGAACCCCA GTCACAACAA GTGCCTCCGA
121    AGTTGCAATA GCGAGAAAGA CTCCTACAGG AACCAAGCAT GCCACGCTCG TTGCAACCTC
181    CTTAAGGTGG AGGAAGAAGA AGAATGCGAA GAAGGTCAAA TTCCACGACC ACGACCACAA
241    CACCCGGAGA GGGAACGTCA GCAACACGGT GAGAAGGAGG AAGACGAAGG TGAGCAGCCA
301    CGTCCATTCC CATTCCCACG CCCACGCCAA CCTCGTCAAG AGGGAGAGCA CGAGCAGAAG
361    GAGGAACACG AATGGCATCG CAAGGAGGAA AAACACGGAG GAAAGGGAAG TGAAGAGGAA
421    ATGATGAGAG TCGGGTTTCC TTTGTTGGTG TTGCTGGGAA CTGTTTTCTT GGCATCAGTT
481    TGTGTCTCAT TAAAGGTGAG AGAGGATGAG AATAACCCTT TCTACTTTAG AAGCTCTAAC
541    AGCTTCCAAA CTCTCTTTGA GAACCAAAAC GTTCGCATTC GTCTCCTCCA GAGATTCAAC
601    AAACGCTCCC CACAACCTGA GAACCTTCGA GACTACCGGA TTGTCCAGTT TCAGTCAAAA
661    CCCAACACAA TCCTTCTCCC CCACCATGCT GACGCCGATT TCCTCCTCTT TGTCTTAGC
721    G
```
