# Supplementary material for: Increased Accumulation of Recombinant Proteins in Soybean Seeds via the Combination Strategy of Polypeptide Fusion and Suppression of Endogenous Storage Proteins
Source: MDPI journal article supplement (doi:10.3390/agronomy13112680), 2023-10-25
Supplement: s1 [file s1]

**Figure S1 Tandem RNAi fragment (723-bp) based on the conservative sequences of five soybean glycinin subunit-encoding genes (*Gy1*, *Gy2*, *Gly3*, *Gy4*, and *Gy5*).**

```
1      ATGGCCAAGC TAGTTTTTTC CCTTTGTTTT CTGCTTTTCA GTGGCTGCTG CTTCGCTTTC
61     AGTTCCAGAG AGCAGCCTCA GCAAAACGAG TGCCAGATCC AAAAACTCAA TGCCCTCAAA
121    CCGGATAACC GTATAGAGTC AGAAGGAGGG CTCATTGAGA CATGGAACCC TAACAACAAG
181    CCATTCCAGT GTGCCGGTGT TGCCCTCTCT CGCTGCACCC TCAACCGCAA CGCCCTTCGT
241    AGACCTTCCT ACACCAACGG TCCCCAGGAA ATCTACATCC AACAAAGGTAA GGGTATTTTT
301    GGCATGATAT ACCCGGGTTG TCCTAGCACA TTTGAAGAGC CTATGGGGAA GCCCTTCACT
361    CTCTCTCTTT CTTCCTTTTG CTTGCTACTC TTGTCGAGTG CATGCTTTGC TATTAGCTCC
421    AGCAAGCTCA ACGAGTGCCA ACTCAACAAC CTCAACGCGT TGGAACCCGA CCACCGCGTT
481    GAGTCCGAAG GTGGTTTGAT TCAAACATGG AACTCTCAAC ACCCTGAGCT GAAATGCGCC
541    GGTGTCACTG TTTCCAAACT CACCCTCAAC CGCAATGGCC TCCACTTGCC ATCTTACTCA
601    CCTATCCCC GGATGATCAT CATCGCCCAA GGGAAAGGAG CACTTGGAGT TGCAATTCCA
661    GGATGTCCTG AGACGTTTGA GGAGCCACAA GAACAATCAA ACAGAAGAGG CTCAAGGTCG
721    CAG
```
